# Supplementary material for: Narrowing down the targets for yield improvement in rice under normal and abiotic stress conditions via expression profiling of yield-related genes
Source: PubMed Central journal article supplement (PMC4883727; doi:10.1186/1939-8433-5-37), 2012-12-22

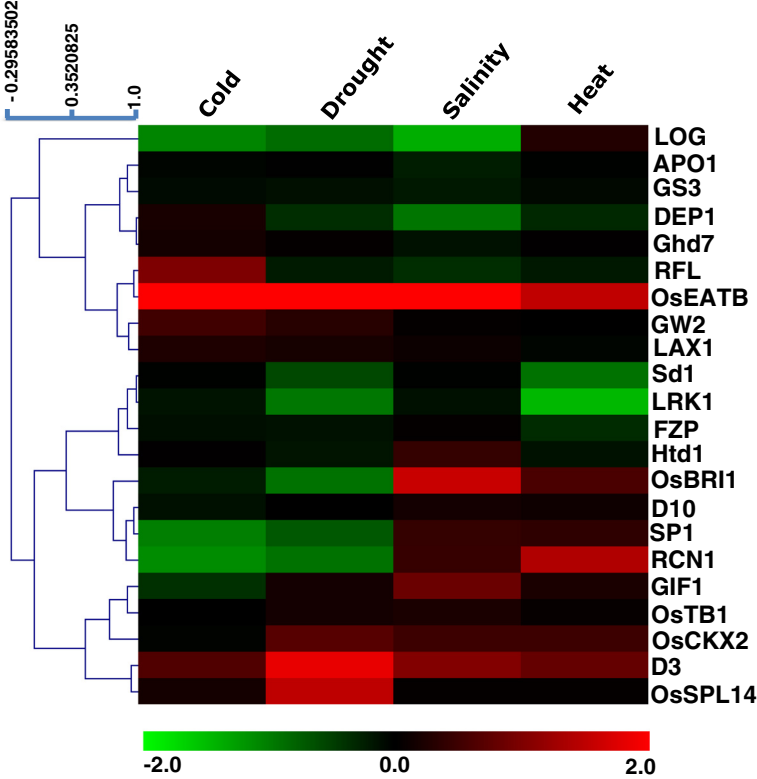

Supplement: 12284_2012_36_MOESM4_ESM.pdf [file 12284_2012_36_MOESM4_ESM.pdf]
